# Supplementary material for: SPON1 Can Reduce Amyloid Beta and Reverse Cognitive Impairment and Memory Dysfunction in Alzheimer’s Disease Mouse Model
Source: PubMed Central journal article supplement (PMC7290723; doi:10.3390/cells9051275), 2020-05-21
Supplement: cells-09-01275-s001.pdf [file cells-09-01275-s001.pdf]

## Supplementary Materials

# ***SPON1* can Reduce Amyloid Beta and Reverse Cognitive Impairment and Memory Dysfunction in Alzheimer's Disease Mouse Model.**

**Soo Yong Park**<sup>1</sup>, **Joo Yeong Kang**<sup>1</sup>, **Taehee Lee**<sup>1</sup>, **Donggyu Nam**<sup>1</sup>, **Chang-Jin Jeon**<sup>2</sup> and **Jeong Beom Kim**<sup>1,\*</sup>

<sup>1</sup> Stem Cell Research Center, School of Life Sciences, Ulsan National Institute of Science and Technology (UNIST), 44919 Ulsan, South Korea; [shorypark@unist.ac.kr](mailto:shorypark@unist.ac.kr) (S.Y.P.); [kangj0594@unist.ac.kr](mailto:kangj0594@unist.ac.kr) (J.Y.K.); [thlee525@hotmail.com](mailto:thlee525@hotmail.com) (T.L.); [namdongg@unist.ac.kr](mailto:namdongg@unist.ac.kr) (D.N.)

<sup>2</sup> Neuroscience Laboratory, Department of Biology, College of Natural Sciences, Kyungpook National University, 41566, Daegu, South Korea; [cjeon@knu.ac.kr](mailto:cjeon@knu.ac.kr)

\* Correspondence: [jbkim@unist.ac.kr](mailto:jbkim@unist.ac.kr); Tel: +82 (52) 217 5272

| <b>name</b>                | <b>sequence</b>                 |
|----------------------------|---------------------------------|
| exo-Spon1 forward          | 5'-CCAAACTGTGCGGAGGTGG-3'       |
| exo-Spon1 reverse          | 5'-AGGTAGCGGTGAGTTCAGGC-3'      |
| exo-Reelin/spondin forward | 5'-GGGATGCTGGCACTGACAG-3'       |
| exo-Reelin/spondin reverse | 5'-AGGTAGCGGTGAGTTCAGGC-3'      |
| endo-Spon1 forward         | 5'-CGTCACTTGGAGCAGGAGTG-3'      |
| endo-Spon1 reverse         | 5'-CCCTCCGACTTGGTCACTTT-3'      |
| Gapdh qRT forward          | 5'-TGCCCCCATGTTTGTGAT-3'        |
| Gapdh qRT reverse          | 5'- TGTGGTCATGAGCCCTTC-3'       |
| Sox2 forward               | 5'-TAGAGCTAGACTCCGGGCGATGA-3'   |
| Sox2 reverse               | 5'-TTGCCTTAAACAAGACCACGAAA-3'   |
| Nestin forward             | 5'-TTGACCTGTGGTATCTCTCGTG-3'    |
| Nestin reverse             | 5'-GAGTCACTCATCATTGCTGCTC-3'    |
| Pax6 forward               | 5'-GCTTCATCCGAGTCTTCTCCGTTAG-3' |
| Pax6 reverse               | 5'-CCATCTTTGCTTGGGAAATCCG-3'    |
| Olig2 forward              | 5'-CAGAGCACTGCACTTGACTTCT-3'    |
| Olig2 reverse              | 5'-CACACTTCTGAGACCACAGGAC-3'    |
| Gapdh forward              | 5'-ACGACCCCTTCATTGACCTCAACT-3'  |
| Gapdh reverse              | 5'-ATATTTCTCGTGGTTCACACCCAT-3'  |

| <b>Antibody</b> | <b>Application</b>      | <b>Host species</b> | <b>Company</b> | <b>Catalog number</b> |
|-----------------|-------------------------|---------------------|----------------|-----------------------|
| Nestin          | 1:400 (ICC)             | Mouse               | Millipore      | MAB353                |
| Sox2            | 1:200 (ICC)             | Goat                | SantaCruz      | sc-17320              |
| V5              | 1:200 (ICC) 1:1000 (WB) | Goat                | abcam          | ab95038               |
| A $\beta$       | 1:1000 (WB)             | Mouse               | Novus          | NBP2-13075            |
| HSC-70          | 1:1000 (WB)             | Rabbit              | abcam          | ab137806              |

\*ICC: immunocytochemistry, WB: western blot

| <b>Day</b>      | <b>Trial 1</b> | <b>Trial 2</b> | <b>Trial 3</b> | <b>Trial 4</b> |
|-----------------|----------------|----------------|----------------|----------------|
| 1               | N              | E              | SE             | NW             |
| 2               | SE             | N              | NW             | E              |
| 3               | NW             | SE             | E              | N              |
| 4               | E              | NW             | N              | SE             |
| 5               | N              | SE             | E              | NW             |
| 6 (probe trial) | NE             |                |                |                |

N: North, E: East, SE: South East, NW: North West, NE: North East.

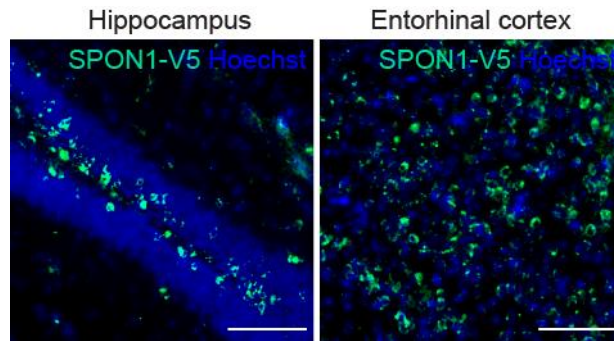

**Figure S1.** Immunofluorescence images of ectopic expression of human SPON1 in injected sites hippocampus (left panel) and entorhinal cortex (right panel). Anti-V5 antibody was used to detect V5-tagged SPON1. Scale bar: 100  $\mu$ m.
